# Supplementary material
Source: PubMed Central journal article supplement (PMC5864213)

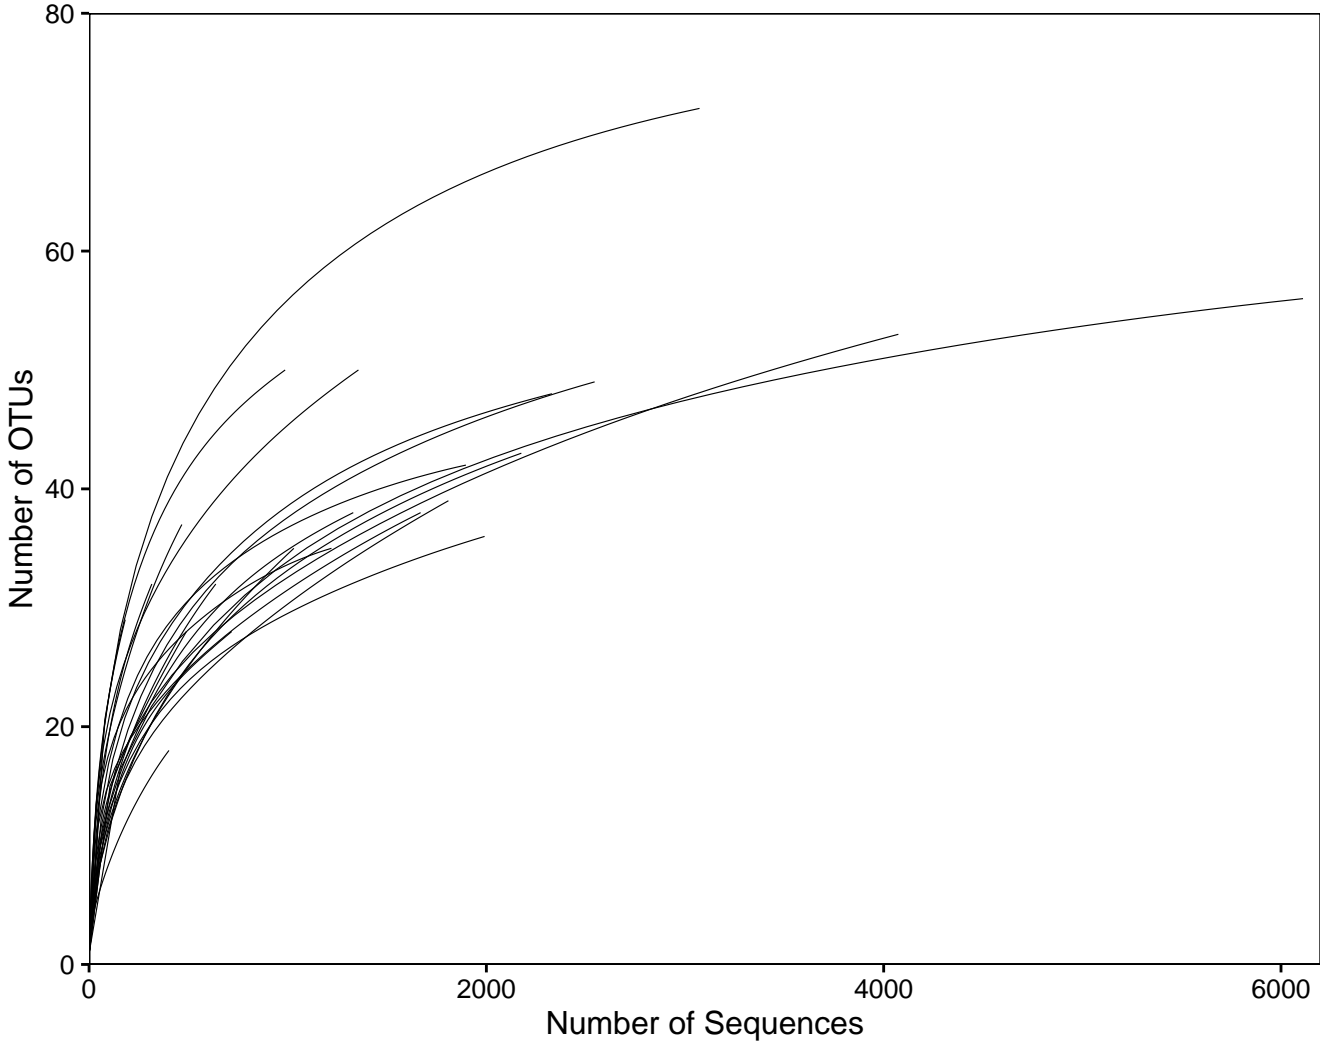

Supplement: 41396_2017_20_MOESM4_ESM.pdf [file 41396_2017_20_MOESM4_ESM.pdf]
